# Supplementary material
Source: Elsevier journal article supplement (https://www.sciencedirect.com/science/article/pii/S0210570519300251)
Supplement: mmc1 [file S0210570519300251:mmc1.doc]

**Table S1.**Comparison of characteristics between patients with S/G>2 and S≤2+G≤2.

| **Characteristic** | **Stage≤2 and Grade≤2, n=123** | **Stage>2 or Grade>2, n=37** | **P value** |
| --- | --- | --- | --- |
| Age (yr) | 34±10 | 38±9 | 0.059 |
| Sex (% male) | 72% | 77% | 0.833 |
| HBeAg (% positive) | 59% | 70% | 0.253 |
| HBV DNA (log10 IU/mL) | 5.9±1.9 | 5.7±1.6 | 0.564 |
| ALT (IU/L) | 124.5±197.8 | 214.6±279.0 | 0.073 |
| AST (IU/L) | 60.1±80.1 | 114.7±120.1 | **0.013** |
| ALP (IU/L) | 70.7±24.2 | 89.8±41.6 | **0.011** |
| GGT (IU/L) | 35.7±42.8 | 85.0±68.4 | **0.000** |
| Total bilirubin (μmol/L) | 12.8±6.1 | 15.9±8.7 | **0.045** |
| Direct bilirubin (μmol/L) | 4.7±3.0 | 7.3±6.5 | **0.025** |
| Albumin(g/L) | 44.7±6.6 | 40.9±7.7 | **0.003** |
| Globulin (g/L) | 29.0±6.9 | 30.1±9.0 | 0.448 |
| WBC (×109/L) | 5.4±1.7 | 4.9±1.8 | 0.136 |
| RBC (×1012/L) | 4.9±0.7 | 4.6±0.9 | **0.030** |
| Hemoglobin (g/L) | 160.6±138.3 | 139.8±29.1 | 0.367 |
| Platelet (×109/L) | 196.5±54.0 | 167.7±65.8 | **0.007** |
| RDW (%) | 12.3±2.2 | 12.6±3.2 | 0.501 |

ALT, alanine transaminase; AST, aspartate transaminase; ALP, alkaline phosphatase; GGT, gamma-glutamyl transpeptidase; WBC, white blood cell count; RBC, red blood cell count; RDW, red cell distribution width. The bold data were considered statistically significant.

**Table S2**. Diagnositc performnce of non-invasive scores for significant fibrosis and severe necroinflammation activity in HBeAg positive and negative patients.

|  | | **HBeAg positive** | | **HBeAg negative** | |
| --- | --- | --- | --- | --- | --- |
| **Diagnosis of significant fibrosis (stage3-4)** | Test | AUROC | 95% CI | AUROC | 95% CI |
| Fib-4 | 0.728 | 0.606-0.850 | 0.772 | 0.642-0.903 |
| APRI | 0.639 | 0.510-0.767 | 0.752 | 0.620-0.883 |
| GPR | 0.726 | 0.607-0.846 | 0.827 | 0.705-0.948 |
| RPR | 0.736 | 0.583-0.889 | 0.760 | 0.599-0.922 |
| **Diagnosis of severe necro- inflammation activity (grade 3-4)** | Test | AUROC | 95% CI | AUROC | 95% CI |
| Fib-4 | 0.844 | 0.737-0.951 | 0.699 | 0.558-0.840 |
| APRI | 0.857 | 0.755-0.959 | 0.774 | 0.642-0.906 |
| GPR | 0.888 | 0.796-0.979 | 0.828 | 0.716-0.939 |
| RPR | 0.665 | 0.513-0.817 | 0.666 | 0.494-0.838 |

Fib-4, fibrosis index based on four factors; APRI, aspartate transaminase (AST)-to-platelet ratio index; GPR, gamma-glutamyl transpeptidase (GGT)-to-platelet ratio; RPR, red cell distribution width (RDW)-to- platelet ratio; AUROC, area under receiver operating characteristic curve.

**Table S3**. Diagnositc performnce of non-invasive scores for significant fibrosis and severe necroinflammation activity in patients with ALT below and above 5×ULN .

|  | | ALT<5×ULN | | ALT≥5×ULN | |
| --- | --- | --- | --- | --- | --- |
| **Diagnosis of significant fibrosis (stage3-4)** | Test | AUROC | 95% CI | AUROC | 95% CI |
| Fib-4 | 0.795 | 0.703-0.886 | 0.590 | 0.251-0.930 |
| APRI | 0.737 | 0.634-0.840 | 0.514 | 0.244-0.785 |
| GPR | 0.809 | 0.715-0.903 | 0.505 | 0.202-0.807 |
| RPR | 0.788 | 0.671-0.904 | 0.552 | 0.261-0.843 |
| **Diagnosis of severe necro-**  **inflammation activity (grade 3-4)** | Test | AUROC | 95% CI | AUROC | 95% CI |
| Fib-4 | 0.735 | 0.616-0.853 | 0.679 | 0.463-0.894 |
| APRI | 0.752 | 0.638-0.867 | 0.720 | 0.511-0.930 |
| GPR | 0.858 | 0.762-0.954 | 0.679 | 0.467-0.890 |
| RPR | 0.678 | 0.522-0.833 | 0.548 | 0.316-0.779 |
